# Supplementary material for: Chronic Fatigue and Postexertional Malaise in People Living With Long COVID: An Observational Study
Source: Oxford University Press journal article supplement (doi:10.1093/ptj/pzac005), 2022-01-08
Supplement: 2021_revised_supplemental_material_2021-11-08masked_pzac005.pdf [file 2021_revised_supplemental_material_2021-11-08masked_pzac005.pdf]

## **SUPPLEMENTARY MATERIAL**

### **Chronic fatigue and post-exertional malaise in people living with long covid: an observational study**

#### **Supplemental Methods: Scoring of the DSQ-PEM, SF-36 and IPAQ-SF**

##### **DSQ-PEM Scoring**

Historically, there has been difficulty in defining and measuring PEM [1, 2], but for the purposes of this study, PEM was used to denote concepts related to post-exertional symptom exacerbation<sup>1</sup>. The DSQ-PEM asks participants about symptoms over a 6-month timeframe. However, we stipulated in the questionnaire instructions that if symptoms had been present for less than six months, participants should consider symptoms since the acute phase of COVID-19 or a positive COVID-19 test. Scoring step 1 and 2 are used in the manuscript. The use of the supplementary DSQ-PEM items in this way was intended for the discrimination of people with ME/CFS from other conditions<sup>3</sup>, and this was not our aim. Here, we use it as a stricter method of identifying PEM, considering our use of the DSQ-PEM outside of the context of ME/CFS. The DSQ-PEM was not used to comment on whether any of the participants in the present study have ME/CFS because this would require a more comprehensive clinical evaluation involving differential diagnoses and identification of other core symptoms [5, 6].

##### **SF-36 Scoring**

The SF-36 measures eight multi-item health concepts (physical functioning, role limitations due to physical health problems, role limitations due to personal or emotional problems, energy/fatigue, emotional wellbeing, social functioning, bodily pain, and general health perceptions). It also includes a single item that provides an indication of perceived change in health. Responses are recoded so that each

## **SUPPLEMENTARY MATERIAL**

### **Chronic fatigue and post-exertional malaise in people living with long covid: an observational study**

item is scored from 0-100%, with higher scores defining a more favorable health state. This questionnaire is a generic health-related quality of life tool that is useful for comparing general and specific populations and the relative burden of a health condition<sup>6</sup>.

#### **IPAQ-SF Scoring**

Data were processed according to standardized protocols available at [www.ipaq.ki.se](http://www.ipaq.ki.se). The IPAQ-SF measures the self-reported frequency and duration (min) of vigorous-intensity activity, moderate-intensity activity, and walking performed in bouts of  $\geq 10$  minutes in the past week. Total weekly minutes for these activities were calculated, converted to metabolic equivalents (MET) and expressed as MET-minutes per week[8, 9]. A summary indicator was used to categorize physical activity as 'high' (either 3 days of vigorous-intensity activity plus an accumulation of  $\geq 1500$  MET-min/week, or  $\geq 5$  days of any combination of activity that resulted in  $\geq 3000$  MET-min/week), 'moderate' (either  $\geq 3$  days of vigorous-intensity activity of  $\geq 20$  min/day,  $\geq 5$  days of moderate-intensity activity or walking for  $\geq 30$  min/day, or  $\geq 5$  days of any combination of activity that resulted in  $\geq 600$  MET-min/week), or 'low' (no physical activity reported or activity below the criteria for 'moderate'). The IPAQ-SF also measures the duration (minutes per day) of time spent sitting on a usual weekday. This includes time spent sitting at a desk, visiting friends, or reading, or sitting or lying down while watching television across various contexts, including work, home, or leisure<sup>9</sup>. This data was reported as minutes per day.

## **SUPPLEMENTARY MATERIAL**

### **Chronic fatigue and post-exertional malaise in people living with long covid: an observational study**

#### **Supplemental Results: IPAQ-SF**

Most participants reported no vigorous physical activity (77.6%). In the remaining subset of participants ( $n=46$ ) who did report vigorous physical activity, this took place on 2 (1-3) days per week, for 60 (30-65) minutes (median and IQR). However, most of these participants indicated that rather than those vigorous activities suggested by the IPAQ-SF (e.g., heavy lifting, digging, aerobics, or fast bicycling), they answered for typical daily activities, which were now rated as vigorous. This should be considered against the description of vigorous activities in the IPAQ-SF as "activities that take hard physical effort and make you breathe much harder than normal." Over half of the participants reported no moderate physical activity (58.5%; note that the IPAQ-SF excludes walking from this category). In the remaining subset of participants ( $n=83$ ) who did report moderate physical activity, this took place on 2 (1-4) days per week, for 50 (20-90) min, and participants made similar comments about the perceived effort of daily activities. Total physical activity over the past week was equivalent to 503 (99-1361) MET-minutes. Physical activity levels were categorized as none/low in 59.8%, moderate in 31.4%, and high in 8.8% of the sample (Table 4). Because the vigorous and moderate activity descriptors may not be valid in this population, later exploratory analysis uses only the walking variable as a measure of physical activity (because it is not based on perceived physical effort or breathing harder).

There were  $n=8$  missing responses for time spent sitting for unknown reasons, though presumably because some participants found the wording unclear for this item. During data inspection, we noticed that some participants answered in total hours for five weekdays or for the full week rather than estimated a single weekday (and one participant left a comment to this effect). We also noticed that

## **SUPPLEMENTARY MATERIAL**

### **Chronic fatigue and post-exertional malaise in people living with long covid: an observational study**

some participants included sleep in their estimate of sitting time (and one participant left a comment to this effect). Rather than devise a rule for correcting this data, we removed all responses >24 hours ( $n=18$ ) and all responses between 19-24 hours (to remove data where sleep was included in the estimate;  $n=11$ ). Therefore, the estimate of sitting time was in  $n=169$  participants, who reported 525 (383-620) min [or 8.8 (6.4-10.3) hours] of time spent sitting per day on weekdays. However, this may be a poor surrogate for daily inactivity because  $n=10$  of these participants left a comment to elaborate on spending time both sitting and lying down (or on the orthostatic challenges of sitting versus lying down. Because the IPAQ-PA specifically asks about time spent sitting as opposed to time spent awake but inactive, a median of 510 min may be an underestimate of sedentary time. Including actigraphy may be necessary in future studies requiring an estimate of physical activity/sedentary time in this population.

## **References**

1. Chu L, Valencia JJ, Garvert DW, Montoya JG. Deconstructing post-exertional malaise in myalgic encephalomyelitis/ chronic fatigue syndrome: a patient-centered, cross-sectional survey. *PLoS one*. 2018;13(6):e0197811. doi:10.1371/journal.pone.0197811
2. Holtzman CS, Bhatia S, Cotler J, Jason LA. Assessment of post-exertional malaise (PEM) in patients with myalgic encephalomyelitis (ME) and chronic fatigue syndrome (CFS): a patient-driven survey. *Diagnostics (Basel)*. 2019;9(1). doi:10.3390/diagnostics9010026

## SUPPLEMENTARY MATERIAL

### Chronic fatigue and post-exertional malaise in people living with long covid: an observational study

3. Cotler J, Holtzman C, Dudun C, Jason LA. A Brief Questionnaire to Assess Post-Exertional Malaise. *Diagnostics (Basel)*. 2018;8(3). doi:10.3390/diagnostics8030066
4. US ME/CFS Clinician Coalition. ME/CFS Treatment Recommendations. Version 1 February 20, 2021. Available at: <https://mecfsccliniciancoalition.org/clinical-management/> (Accessed May, 2021).
5. Committee on the Diagnostic Criteria for Myalgic Encephalomyelitis/Chronic Fatigue Syndrome, Board on the Health of Select Populations, Institute of Medicine. *Beyond Myalgic Encephalomyelitis/Chronic Fatigue Syndrome: Redefining an Illness*. National Academies Press (US); 2015. Accessed June 6, 2021. <http://www.ncbi.nlm.nih.gov/books/NBK274235/>
6. Ware JE. SF-36 health survey update. *Spine (Phila Pa 1976)*. 2000;25(24):3130-3139. doi:10.1097/00007632-200012150-00008
7. Craig CL, Marshall AL, Sjöström M, et al. International physical activity questionnaire: 12-country reliability and validity. *Med Sci Sports Exerc*. 2003;35(8):1381-1395. doi:10.1249/01.MSS.0000078924.61453.FB
8. Ainsworth BE, Haskell WL, Whitt MC, et al. Compendium of physical activities: an update of activity codes and MET intensities. *Med Sci Sports Exerc*. 2000;32(9 Suppl):S498-504. doi:10.1097/00005768-200009001-00009
9. Silsbury Z, Goldsmith R, Rushton A. Systematic review of the measurement properties of self-report physical activity questionnaires in healthy adult populations. *BMJ Open*. 2015;5(9):e008430. doi:10.1136/bmjopen-2015-008430

**SUPPLEMENTARY MATERIAL**

**Chronic fatigue and post-exertional malaise in people living with long covid: an observational study**
